# Supplementary material for: Neuronavigated Right Orbitofrontal 20 Hz Theta Burst Transcranial Magnetic Stimulation Augmentation for Obsessive–Compulsive Disorder with Comorbid Depression and Anxiety Disorders: An Open-Label Study
Source: MDPI journal article supplement (doi:10.3390/brainsci14050483), 2024-05-10

## Supplementary Materials:

Table S1. Demographical and Clinical Characteristics of the Cohort.

| Patients (#) | Average Age (Years) | Gender             | Diagnoses (# of Patients)                                                                                                                                                                                                      | Average Duration of Illness (Years) | Average Number of Failed Psychiatric Medications (#) | Average Duration of Current OCD Episode (Years) | Patients Taking Psychiatric Medications Concurrently with TMS |
|--------------|---------------------|--------------------|--------------------------------------------------------------------------------------------------------------------------------------------------------------------------------------------------------------------------------|-------------------------------------|------------------------------------------------------|-------------------------------------------------|---------------------------------------------------------------|
| 14           | 26.4                | 6 Female<br>8 Male | Obsessive Compulsive Disorder (14)<br>Major Depressive Disorder (12)<br>Panic Disorder (6)<br>Generalized Anxiety Disorder (7)<br>Body Dysmorphic Disorder (1)<br>Anorexia (1)<br>Attention-Deficit/Hyperactivity Disorder (1) | 9.1                                 | 4.7                                                  | 2.7                                             | 12                                                            |

Table S2. Protocol Parameter.

| Stimulation Site | Number of Pulses | Motor Threshold | Pulse Frequency (Hz) | Pulses/Burst | Burst Frequency (Hz) | Stimulation Interval (sec) | Intertrain interval (sec) | Uplifting Music | Earplugs |
|------------------|------------------|-----------------|----------------------|--------------|----------------------|----------------------------|---------------------------|-----------------|----------|
| 1. RDLPCF        | 3600-4800        | 90-95%          | 20                   | 3            | 5                    | 240-320                    | 0                         |                 | x        |
| 2. LDLPFC        | 4950             | 90-95%          | 20                   | 3            | 5                    | 2                          | 8                         | x               |          |
| 3. ROFC          | 1800-2700        | 90-95%          | 20                   | 3            | 5                    | 120-180                    | 0                         |                 | x        |

Figure S1. (A) YBOCS-SR scale scores over ten treatment weeks for all patients with moderate-to-severe OCD diagnosis (YBOCS-SR  $\geq 20$ ). (B) BDI-II scale scores over ten treatment weeks for all patients with moderate-to-severe MDD diagnosis (BDI  $\geq 20$ ) (C) BAI scale scores over ten treatment weeks for all patients with moderate-to-severe GAD/PD diagnosis (BAI  $\geq 15$ ). Missing values were addressing using last observation carried forward (LOCF) imputation.

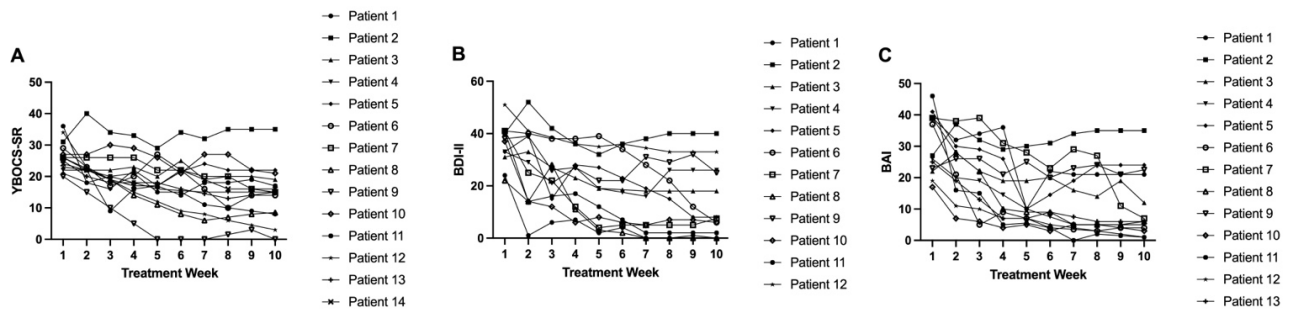

Supplement: s1 [file s1]
